# Supplementary material
Source: PubMed Central journal article supplement (PMC8906703)
Supplement: ivaa220_supplementary_data.pdf [file ivaa220_supplementary_data.pdf]

## Supplementary data

Table 1: Pre-operative data collection and histological data

|                                                                                                                                                                                                                                                                                                                                                                                                                                                               |
|---------------------------------------------------------------------------------------------------------------------------------------------------------------------------------------------------------------------------------------------------------------------------------------------------------------------------------------------------------------------------------------------------------------------------------------------------------------|
| <p>General data:</p> <ul style="list-style-type: none"><li>• Gender: W/M</li><li>• Age: years</li><li>• Forced Expiratory Volume in one second (FEV1): mL and percent of predicted value (%)</li><li>• Discovery mode: asymptomatic incident, or presence of symptoms</li></ul>                                                                                                                                                                               |
| <p>Medical history:</p> <ul style="list-style-type: none"><li>• Cardiovascular: ischemic heart disease, atrial fibrillation, coronary artery bypass surgery</li><li>• Thoracic: lung resection surgery, surgical treatment of a pneumothorax</li><li>• Pulmonary pathology: COPD, overlap syndrome, sleep apnea, pulmonary embolism, tuberculosis and asthma</li><li>• Obesity: BMI &gt;30</li><li>• HTA</li><li>• Diabetes</li><li>• Smoker status</li></ul> |
| <p>Type of Pathology:</p> <ul style="list-style-type: none"><li>• Cancer: primary or secondary</li><li>• Benin</li><li>• Infectious (tuberculosis, bronchial dilatations, pulmonary aspergillosis)</li><li>• Degenerative</li><li>• Congenital</li></ul>                                                                                                                                                                                                      |
| <p>Histology in case of cancer</p> <ul style="list-style-type: none"><li>• Adenocarcinoma</li><li>• Squamous cell carcinoma</li><li>• Neuroendocrine carcinoma</li></ul>                                                                                                                                                                                                                                                                                      |

- Carcinoid tumor (typical, atypical)
- Metastasis of another cancer
- Large cell carcinoma
- Cystic adenoid carcinoma
- Lymphoma
- Solitary fibrous tumour

Stage of the disease

- TNM (7th edition)
- N1/N2+
- T1, T2, T3, T3, T4
- M1a/M1b

W/M: women/men, BMI: Body Mass Index, COPD: Chronic Obstructive Pulmonary Disease, HTA: hypertension

Table 2: Items collected in the post-operative period

|                                                                                                                                                                                                                                                                                                                                                                                                                                                                                                                                                                                                                                                                                                                                                                                            |
|--------------------------------------------------------------------------------------------------------------------------------------------------------------------------------------------------------------------------------------------------------------------------------------------------------------------------------------------------------------------------------------------------------------------------------------------------------------------------------------------------------------------------------------------------------------------------------------------------------------------------------------------------------------------------------------------------------------------------------------------------------------------------------------------|
| <p>Perioperative complications</p> <ul style="list-style-type: none"><li>• Air leak: in days, prolonged air leak if &gt;7 days</li><li>• PAF</li><li>• Pneumopathy: increased congestion and sputum associated with inflammatory biological markers and/or radiographic degradation, and febrile ascension, continued antibiotic prophylaxis as antibiotic therapy</li><li>• ARDS</li><li>• Surgical revision: technical defect, post-operative bleeding</li><li>• Post-operative death</li></ul>                                                                                                                                                                                                                                                                                          |
| <p>Dindo Clavien Classification</p> <ul style="list-style-type: none"><li>• 0: No deviation from post-operative outcomes</li><li>• 1: Any deviation from post-operative outcomes, without the use of commonly used drugs, or surgical, endoscopic or radiological intervention</li><li>• 2: Complication requiring drug treatment, including blood transfusion/plasma or unplanned introduction of parenteral nutrition</li><li>• 3a: Complication requiring surgical, endoscopic or radiological treatment without the use of general anesthesia</li><li>• 3b: Same as 3a, under general anesthesia</li><li>• 4a: Vital complication requiring intensive care with single organ dysfunction</li><li>• 4b: Same as 4a, with multi-organ dysfunction</li><li>• 5: Patient's death</li></ul> |
| <p>Length</p> <ul style="list-style-type: none"><li>• Chest tube</li><li>• Hospitalization</li></ul>                                                                                                                                                                                                                                                                                                                                                                                                                                                                                                                                                                                                                                                                                       |

Visual Analogue Pain Scale

- D1 evaluation: 1 to 10

PAF: postoperative atrial fibrillation, ARDS: Acute respiratory failure syndrome, D1: day one

Table 3: Reasons for diagnosis and cohort patient history

|                       |                                                                                                                                                                            |
|-----------------------|----------------------------------------------------------------------------------------------------------------------------------------------------------------------------|
| Disease discovery     | Lung Cancer: 126/161 (78.2%)                                                                                                                                               |
| Reasons for diagnosis | -Diagnosis or follow up of another cancer (26.1%)<br>-Incidental discovery (19.9%)<br>-Chronic cough or modified cough (12.5%)                                             |
| Patient history       | -Cardiovascular history: 143 (28.5%)<br>-Thoracic surgery: 49 (9.8%)<br>-Underlying pulmonary pathology: 190 (37.9%)<br>-Hypertension: 206 (41.1%)<br>-Obesity: 78 (15.5%) |

Table 4: Causes of conversion (According to Gazala publication in 2011)

| <u>Class</u> | <u>Intraoperative condition</u>                               |
|--------------|---------------------------------------------------------------|
| Vascular     | Wound of the pulmonary artery, pulmonary vein or other vessel |
| Anatomical   | Adhesions, tumor size or location                             |
| Lymph Nodes  | Bulky, sticky, calcified                                      |
| Technical    | Stapler misfire, equipment failure                            |

Table 5: Histopathological findings

| Histopathological findings          | Patients (%) |
|-------------------------------------|--------------|
| Adenocarcinomas                     | 263 (59.1)   |
| Squamous cell carcinomas            | 88 (19.8)    |
| Metastases from different locations | 54 (12.1)    |
| Carcinoid tumours                   | 18 (4)       |
| Large cell carcinomas               | 13 (2.9)     |
| Cystic adenoid carcinomas           | 6 (1.3)      |
| Lymphomas                           | 2 (0.4)      |
| Small cell neuroendocrine carcinoma | 1 (0.2)      |
| Isolated fibrous cancer             | 1 (0.2)      |
| Total                               | 446          |

Table 6: Univariable analysis for perioperative complications

| Variables         | ORs, 95% CI        | p=     |
|-------------------|--------------------|--------|
| FEV1              | 0.99, 0.98 to 1    | 0.19   |
| Age               | 1.03, 1 to 1.05    | 0.026  |
| COPD              | 2.46, 1.44 to 4.19 | 0.001  |
| Year of procedure | 1.44, 1.22 to 1.7  | 0.0001 |
| Conversion        | 3.42, 1.79 to 6.54 | 0.0004 |

ORs: Odds ratios, FEV1: Forced Expiratory Volume in one second, COPD: Chronic Obstructive Pulmonary Disease



Table 7: Multivariable analysis for conversion and perioperative complications, logistic regression model

| Variables (events)                    | Logistic regression model<br>(events) | ORs, 95% CI        | p=     |
|---------------------------------------|---------------------------------------|--------------------|--------|
| Conversion (44)                       | Age (44)                              | 1.02, 0.99 to 1.01 | 0.21   |
|                                       | Year of procedure (44)                | 0.87, 0.69 to 1.1  | 0.23   |
|                                       | FEV1 (44)                             | 1.00, 0.99 to 1.02 | 0.57   |
|                                       | COPD (7)                              | 0.92, 0.32 to 2.7  | 0.89   |
|                                       | Gender (44)                           | 0.94, 0.47 to 1.89 | 0.86   |
|                                       | Pulmonary disease (19)                | 1.69, 0.77 to 3.72 | 0.18   |
|                                       | Obesity (6)                           | 0.89, 0.36 to 2.25 | 0.82   |
| Perioperative<br>complication<br>(95) | FEV1 (95)                             | 0.99, 0.98 to 1    | 0.23   |
|                                       | Age (95)                              | 1.02, 1 to 1.05    | 0.034  |
|                                       | COPD (26)                             | 1.22, 0.53 to 2.81 | 0.63   |
|                                       | Year of procedure (95)                | 1.56, 1.3 to 1.86  | 0.0001 |
|                                       | Conversion (18)                       | 4.47, 2.21 to 9.05 | 0.0001 |
|                                       | Pulmonary disease (45)                | 1.38, 0.69 to 2.76 | 0.36   |
|                                       | Obesity (8)                           | 0.34, 0.15 to 0.75 | 0.008  |
|                                       | Gender (95)                           | 0.72, 0.43 to 1.23 | 0.23   |

ORs: Odds ratios, FEV1: Forced Expiratory Volume in one second, COPD: Chronic Obstructive Pulmonary Disease
